# Supplementary material
Source: PubMed Central journal article supplement (PMC4249308)

## Supplemental material

### Table S1. Primers used in this study

#### Fig S1. Schematic of the generation of DNA-construct used to generate the transgenic line *OVA::Hep17<sub>hep17</sub>*

Schematic representation of the *hep17* gene locus and the generation of the DNA construct used to generate *OVA::Hep17<sub>hep17</sub>*. OVA (blue) is fused to *hep17* coding sequence (bright yellow box; signal peptide, yellow hatched box) under the control of the *hep17* 5'-UTR promoter and 3' terminus (light yellow boxes). The two *230p* targeting sequences (hatched boxes) flank the OVA expression cassette (see also Material and Methods). The position of *hep17* gene relative to start codon (+/- bp), primers (**Table S1**) and restriction sites used are shown. SacII sites (red) were introduced to linearize the vector pL1884 prior to transfection.

#### Fig S2. Characterisation of OVA expression in different transgenic *P. berghei* NK65 and ANKA lines.

(A) Schematic representation of the *230p* locus in the reference *P. berghei* NK65 (GIMO<sub>PbNK65</sub>) mother line and the two OVA-expressing transgenic lines. The GIMO<sub>PbNK65</sub> has the positive and negative selectable marker cassette (*hdhfr::yfcu*, black box) inserted into *P. berghei* NK65 *230p* locus. The OVA-expression cassettes were introduced into *230p* by double cross-over homologous recombination using the gene

targeting regions (hatched boxes) using GIMO transfection method. The *OVA<sub>hsp70</sub>* line (2169cl1) encodes unconjugated full-length ovalbumin (ova; blue box) under the control of 5'-(promoter) and 3'-(terminator) UTRs of the *P. berghei hsp70* gene (grey boxes); The *OVA::mCherry<sub>hsp70</sub>* line (2170cl1;) encodes OVA which is C-terminally fused to mCherry (red box) under the control of 5'-UTR of *hsp70* and the 3'-UTR of *dhfr/ts* (white box). The direction of transcription is indicated by the arrows.

**(B)** Southern analyses of PFG-separated chromosomes confirm the integration of the constructs into the *230p* locus on chromosome 3 of the two transgenic NK65 lines, resulting in the removal of the *dhfr::yfcu* selection cassette. Hybridization was performed with a mixture of two probes, a control probe recognizing *p25* on chromosome (Chr.) 5 and a *dhfr* probe recognizing *dhfr::yfcu* on chromosome 3.

**(C)** Northern blot analysis of OVA-transgene transcription in purified schizonts of the two transgenic NK65 lines. Blots were hybridized using a PCR probe recognizing *ova* (primers 6466/6467, **Table S1**). As a loading control an oligonucleotide probe L644R was used that recognizes the large subunit (*lsu*) rRNA. wt, wild-type *P. berghei* NK65 parasites.

**(D)** Western analysis of OVA-expression in purified schizonts in the two transgenic NK65 lines. Blots were stained with anti-OVA antibodies. Anti-HSP70 antibody staining was used as a loading control. wt, wild-type *P. berghei* NK65 parasites.

**(E)** Western analysis (long exposure) confirming OVA-expression in purified schizonts of 2 different clones (cl.1 and cl.2) of transgenic *P. berghei* ANKA *OVA<sub>hsp70</sub>* parasites (OVA).

Blots were stained with anti-OVA antibodies and anti-HSP70 antibody as a loading control.

**(F)** Western analysis indicates that a fraction of fusion protein OVA::mCherry expressed in PbANKA *OVA::mCherry<sub>hsp70</sub>* line (OVA::mC) is truncated because of a specific cleavage within mCherry. Western blots were prepared from proteins extracted from RBC infected with schizonts of OVA::mC or OVA::Hep17 (*OVA::Hep17<sub>hep17</sub>*) lines, and stained with anti-OVA (left) and anti-mCherry (right) antibodies. Black arrows indicate full-length OVA::mCherry (~75kDa) recognised by both anti-OVA and anti-mCherry antibodies. Anti-OVA antibody also recognised a truncated version of OVA::mC protein (~55kDa, white arrow). A ~20kDa band (red arrow) showing the remainder of the OVA::mC protein was recognised by anti-mCherry antibody indicating that in a fraction of the fusion protein a specific cleavage had occurred within mCherry. OVA::Hep17 line is included as a control and single full length band (~62kDa) is visible only when the blot was probed with anti-OVA antibodies.

**(G)** The level of OVA-expression in synchronized blood stages of *OVA::Hep17<sub>hep17</sub>* and *OVA::mCherry<sub>hsp70</sub>* parasites. Trophozoites (Troph; 12-16 hours post invasion) and immature schizonts (Imm. Schiz; 18-22 hours post invasion) were obtained from synchronised infections. Western blots were stained with anti-OVA antibodies and anti-HSP70 antibodies as a loading control. Relative OVA expression level was calculated as the ratio between Western staining intensities of OVA and HSP70, which were quantified using Image J.

**Fig S3. The course of blood stage infection (parasitemia and ECM) in mice infected with the different *P. berghei* ANKA lines.**

**(A)** Parasitemia (% of infected erythrocytes) in tail blood of mice infected with  $10^4$  parasitised RBC (pRBC) of different *P. berghei* ANKA lines, GIMO<sub>ANKA</sub> (wild-type control), *OVA*<sub>hsp70</sub> (OVA), *OVA::mCherry*<sub>hsp70</sub> (OVA::mC), *OVA::Hep17*<sub>hep17</sub> (OVA::Hep17). The results are the mean +/- SEM of a minimum of 2 separate experiments with a minimum total of 8 mice per group. **(B)** Kinetics of development of experimental cerebral malaria (ECM) shown as percentage of survival of mice infected with  $10^4$  pRBC of different PbANKA lines. ECM was defined as stage 4 or 5 of the clinical scale of ECM symptoms (see Materials and Method section) and the animals were euthanized when observed at stage 4 or 5. The results are from 2 separate experiments with a minimum total of 8 mice per group.

**Fig S4. The location of OVA expression in blood stage parasites influences the activation of OVA-specific T cells during early stage of infection.**

10,000 naïve CD45.1<sup>+</sup>OT-I and 250,000 naïve CD45.1<sup>+</sup>OT-II cells were adoptively transferred into CD45.2<sup>+</sup>C57BL/6 mice one day prior to infection ( $10^4$  pRBC i.v.) with different *P. berghei* ANKA lines, GIMO<sub>ANKA</sub> (control), *OVA*<sub>hsp70</sub> (OVA), *OVA::mCherry*<sub>hsp70</sub> (OVA::mC), *OVA::Hep17*<sub>hep17</sub> (OVA::Hep17).

**(A)** Representative flow cytometric plots of total and donor CD4<sup>+</sup> and CD8<sup>+</sup> T cells in spleens of mice infected with different *P. berghei* ANKA lines at day 4 after infection. Hierarchical gating of total splenic CD4<sup>+</sup> and CD8<sup>+</sup> T cells (top row); host CD45.1<sup>-</sup>CD4<sup>+</sup> T

cells and donor OVA-specific CD45.1<sup>+</sup>CD4<sup>+</sup> OT-II cells (middle row); host CD45.1<sup>-</sup>CD8<sup>+</sup> T cells and donor OVA-specific CD45.1<sup>+</sup>CD8<sup>+</sup> OT-I cells (bottom row). **(B)** Percentages and absolute numbers (mean +/- SEM) of total and donor (OT-I/O-TII) T cells in spleens of mice (n=4) infected with different *P. berghei* ANKA lines at day 4 after infection. There was no significant expansion of total splenic T cells (left 4 graphs) nor OVA-specific OT-I or OT-II cells during infection with any of the *P. berghei* ANKA lines (right 4 graphs). The results are representative of 2 separate experiments. **(C)** Percentages and absolute numbers (mean +/- SEM) of donor (OT-II) T cells in spleens of mice (n=4) infected with different *P. berghei* ANKA lines at day 4 after infection. The activation of CD4<sup>+</sup>CD45.1<sup>+</sup> OT-II cells was determined by examining the expression of CD69, CD25, Ki67, CD44 and CD62L. The results are representative of 2 separate experiments. \*= p<0.05; \*\*= p<0.01; \*\*\*= p<0.001.

**Fig S5. Comparison of the endogenous splenic T cell responses in mice infected with the different *P. berghei* ANKA lines.**

10,000 naïve CD45.1<sup>+</sup>OT-I and 250,000 naïve CD45.1<sup>+</sup>OT-II cells were adoptively transferred into CD45.2<sup>+</sup>C57BL/6 mice one day prior to infection with the different *P. berghei* ANKA lines (10<sup>4</sup> pRBC i.v.), GIMO<sub>ANKA</sub> (control), OVA<sub>hsp70</sub> (OVA), OVA::mCherry<sub>hsp70</sub> (OVA::mC), OVA::Hep17<sub>hep17</sub> (OVA::Hep17). The mean percentages of activated endogenous (recipient CD45.1<sup>-</sup>) T cells was calculated in the spleens of mice (n=4) infected with different *P. berghei* ANKA lines on Day 4 and Day 6 of infection. T cell activation was assessed by examining the expression of CD69, CD25, CD44 and CD62L

and proliferation was assessed through expression of Ki67. The results are the mean +/- SEM of the group with 4 mice per group and are representative of 2 separate experiments. \*= p<0.05; \*\*= p<0.01; \*\*\*= p<0.001.

**Fig S6. Comparison of the endogenous intracerebral T cell responses in mice infected with the different *P. berghei* ANKA lines.**

10,000 naïve CD45.1<sup>+</sup>OT-I and 250,000 naïve CD45.1<sup>+</sup>OT-II cells were adoptively transferred into CD45.2<sup>+</sup>C57BL/6 mice one day prior to infection with the different *P. berghei* ANKA lines (10<sup>4</sup> pRBC i.v.), GIM<sub>ANKA</sub> (control), OVA<sub>hsp70</sub> (OVA), OVA::mCherry<sub>hsp70</sub> (OVA::mC), OVA::Hep17<sub>hep17</sub> (OVA::Hep17). The mean percentages of activated endogenous (recipient CD45.1<sup>-</sup>) T cells was calculated in the brains of mice (n=4) infected with different *P. berghei* ANKA lines on Day 6 of infection, when infected mice developed ECM. T cell activation was assessed by examining the expression of CD69, CD25, CD44 and CD62L and proliferation was assessed through expression of Ki67. The results are the mean +/- SEM of the group with 4 mice per group and are representative of 2 separate experiments. \*= p<0.05; \*\*= p<0.01; \*\*\*= p<0.001.

**Table S1. Primers used in this study**

| No.                                            | Primer sequences                                            | Restriction sites           | Description         |
|------------------------------------------------|-------------------------------------------------------------|-----------------------------|---------------------|
| <b><i>Primers for construct generation</i></b> |                                                             |                             |                     |
| 6464                                           | CCGC <b>GGATCC</b> ATGGGCTCCATCGGTGCAG                      | <i>Bam</i> HI               | OVA, F              |
| 6465                                           | GCGC <b>CACCGGCGA</b> CTCAAGGGGAAACACATCTG                  | <i>Sgr</i> AI               | OVA, R              |
| 6466                                           | CCCG <b>CTCGAG</b> ATGGGCTCCATCGGTGCAG                      | <i>Xho</i> I                | OVA, F              |
| 6467                                           | CCGC <b>GGATCC</b> AGGGGAAACACATCTGCC                       | <i>Bam</i> HI               | OVA, R              |
| 6920                                           | GCGCAATTC <b>CATATG</b> ATGGGCTCCATCGGTGCAG                 | <i>Nde</i> I                | OVA, F              |
| 6659                                           | ATAAGAAT <b>GCGGCCGC</b> TGTCAATAATATTTATTTTGGTACAC         | <i>Not</i> I                | 5' <i>hep17</i> , F |
| 6660                                           | GCGAATTC <b>CATATG</b> TTTATTTTTTCCATAAGCATTG               | <i>Nde</i> I                | <i>hep17</i> , R    |
| 6661                                           | GCG <b>GGATCCGGGATCGAT</b> GGTAAAAGTGGCTCCAAAAATG           | <i>Bam</i> HI, <i>Cl</i> AI | <i>hep17</i> , F    |
| 6662                                           | CGG <b>GGTACC</b> ATTGTTTGTGGTCATAACATAG                    | <i>Kpn</i> I                | 3' <i>hep17</i> , R |
| 6838                                           | CCCG <b>CTCGAGCCGCGG</b> TATATGGTAAAGAAGCTACTAACAC          | <i>Xho</i> I, <i>Sac</i> II | 5' <i>230p</i> , F  |
| 6839                                           | CCCG <b>GAATTC</b> AGGATGTGTTTTATTTGGATGTG                  | <i>Eco</i> RI               | 5' <i>230p</i> , R  |
| 5587                                           | CCGG <b>GGTACCA</b> AATTCTTTGAGCCCGTTAATG                   | <i>Kpn</i> I                | 3' <i>230p</i> , F  |
| 6840                                           | CGG <b>GGTACCGCGG</b> CTATATTTTTGGTTTTATAATCTTCAC           | <i>Kpn</i> I, <i>Sac</i> II | 3' <i>230p</i> , R  |
| <b><i>Primers for probe generation</i></b>     |                                                             |                             |                     |
| 886                                            | GGAAGATCTATGGTTGGTTCGCTAAACTGCATCG                          |                             | <i>hdhfr</i> , F    |
| 887                                            | GGAAGATCTTTAATCATTCTTCTCATATACTTC                           |                             | <i>hdhfr</i> , R    |
| 1462                                           | CATGCCATGGATGAATACTTATTACAGTG                               |                             | <i>p25</i> , F      |
| 1463                                           | CCGGAATTCTTAAATGATATTTGAAAATATTAG<br>GGAAACAGTCCATCTATAATTG |                             | <i>p25</i> , R      |

F = forward primer, R= reverse primer

**Red**, restriction sites

Figure S1

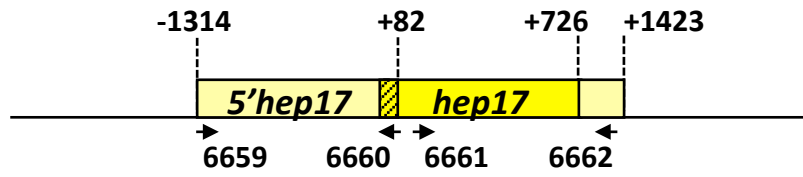

*hep17* genomic locus  
PBANKA\_092670

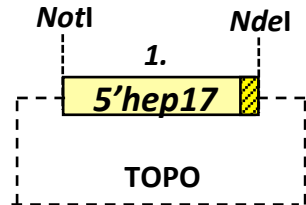

Intermediate vector  
constructed in pCR2.1-  
TOPO vector

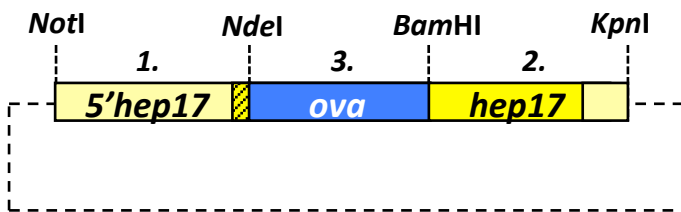

Intermediate vector  
constructed in pCR2.1-  
TOPO vector

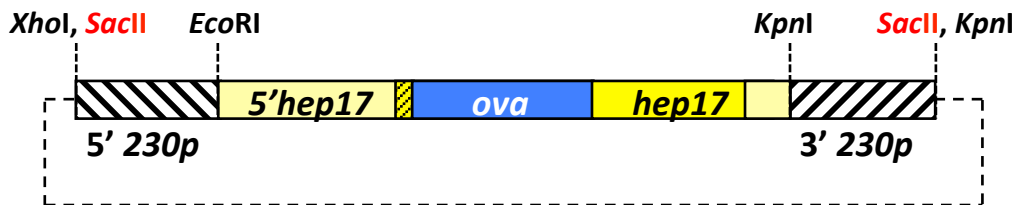

Final construct  
pL1884



Figure S2

A

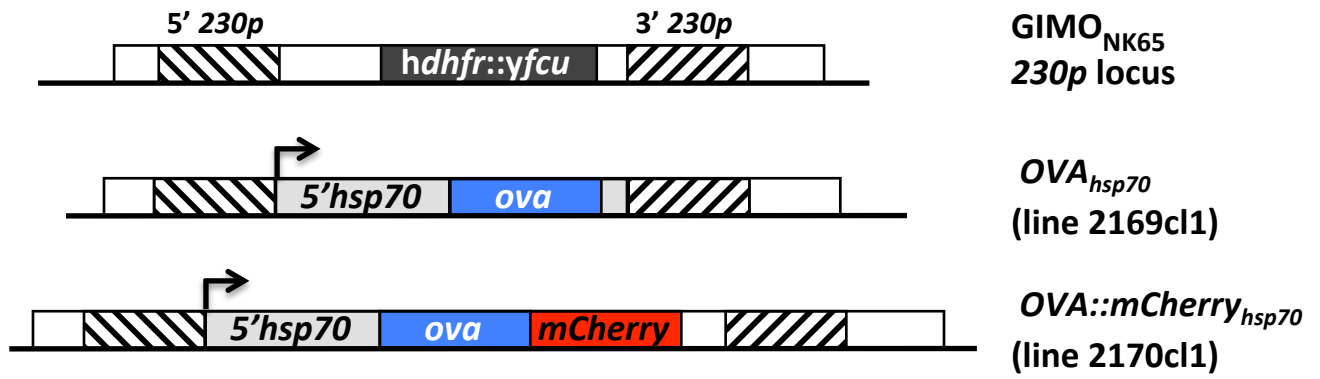

B

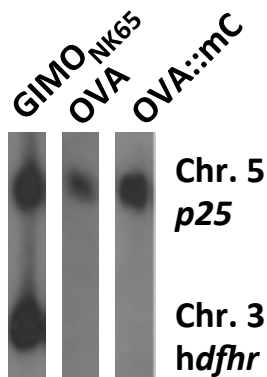

C

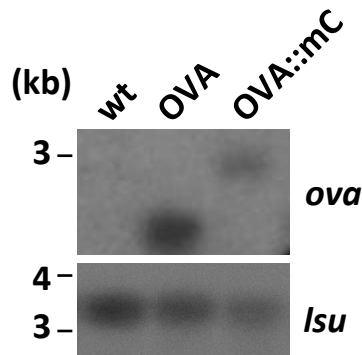

D

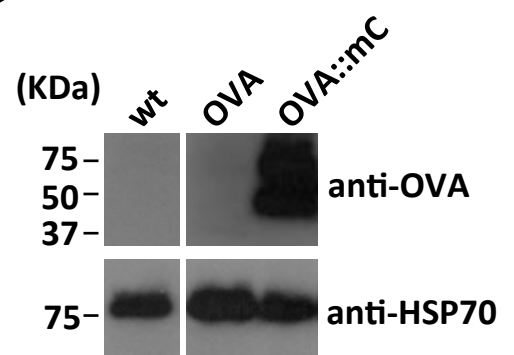

E

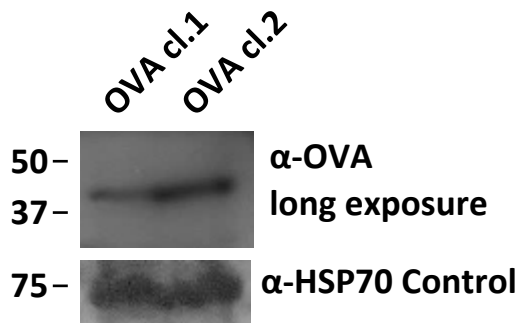

F

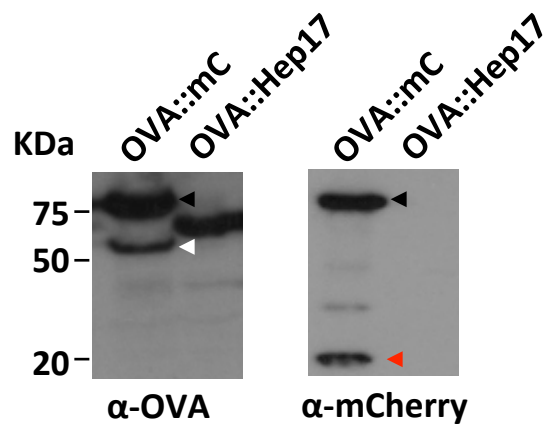

G

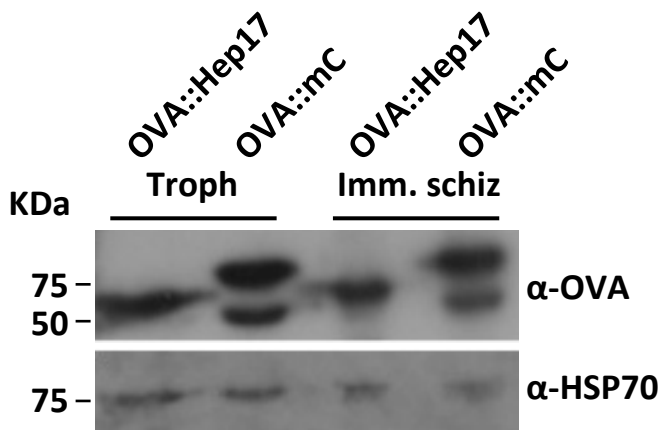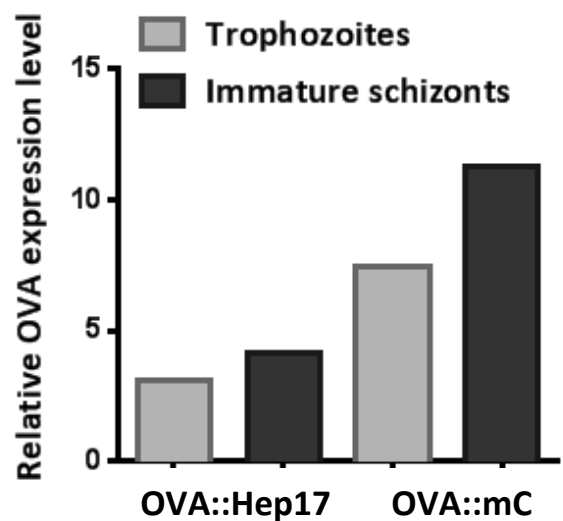

Figure S3

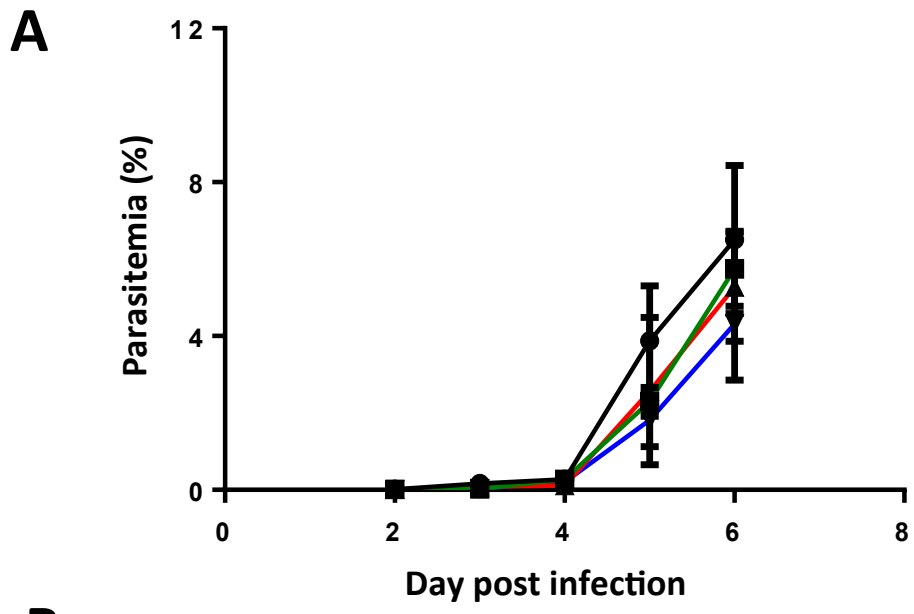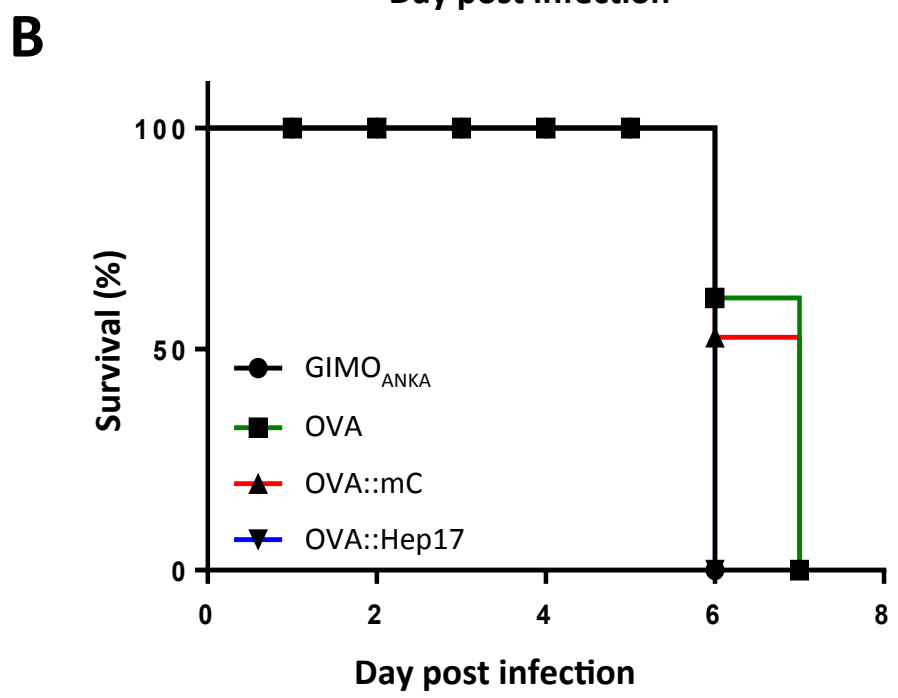

**Figure S4**

**A**

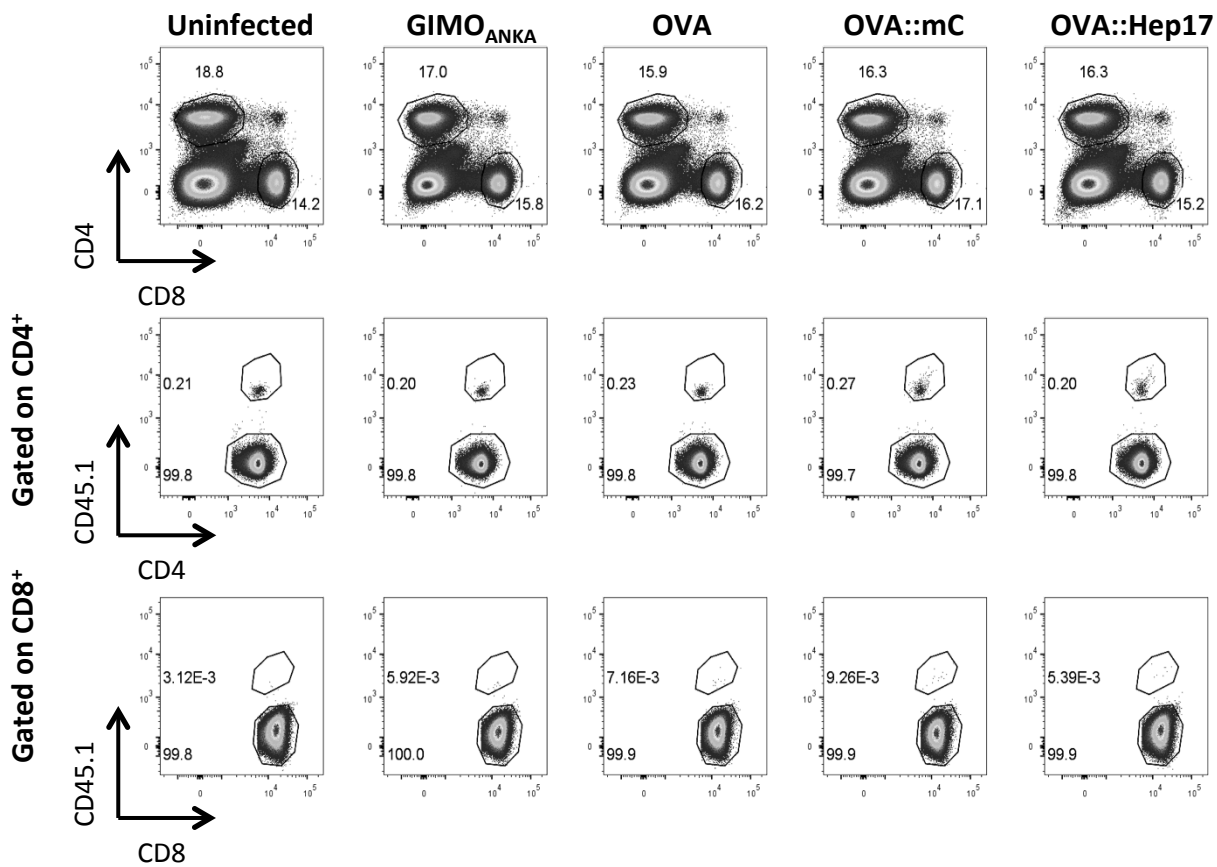

**B**

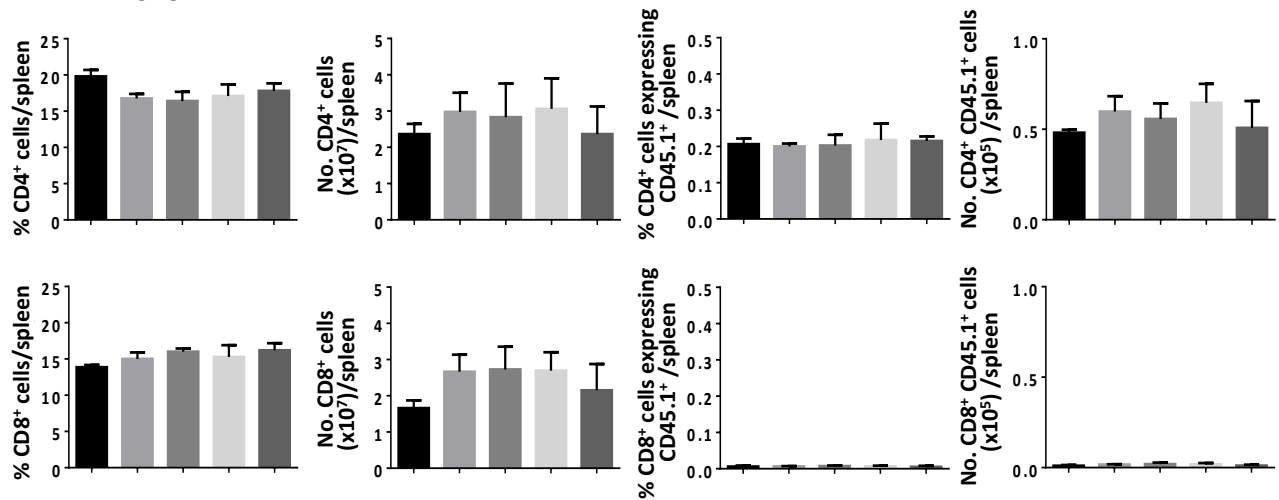

**C**

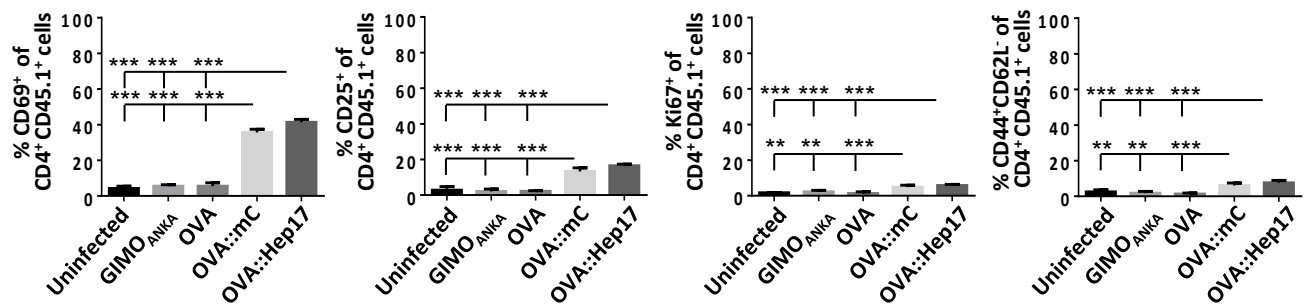

**Figure S5**

**D4**

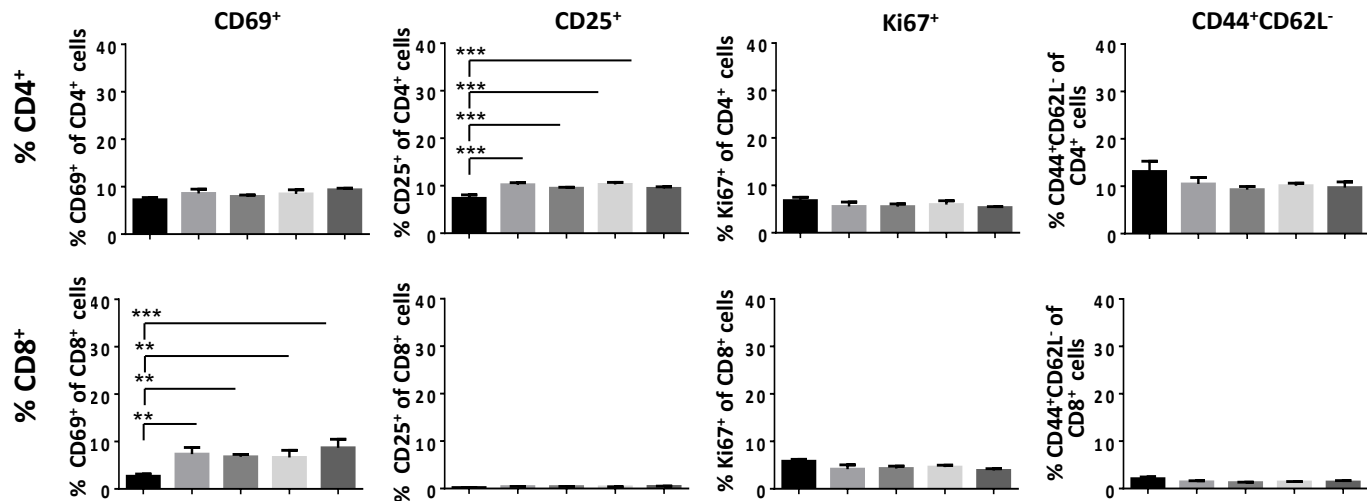

**D6**

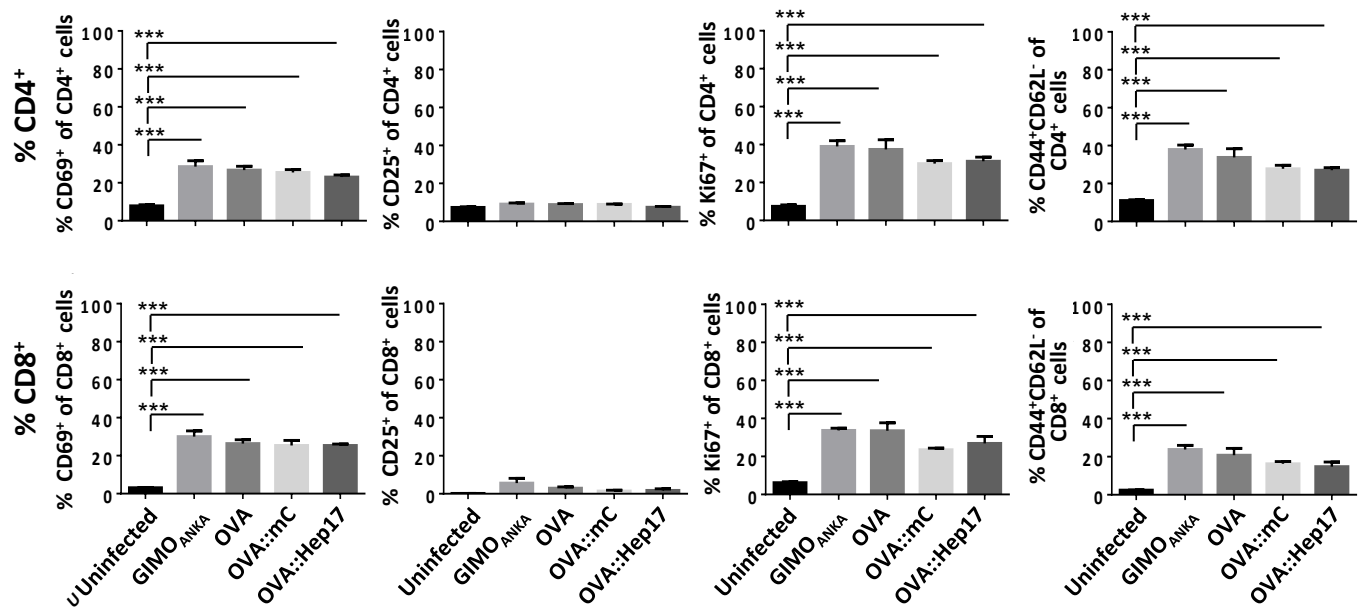

Figure S6

D6

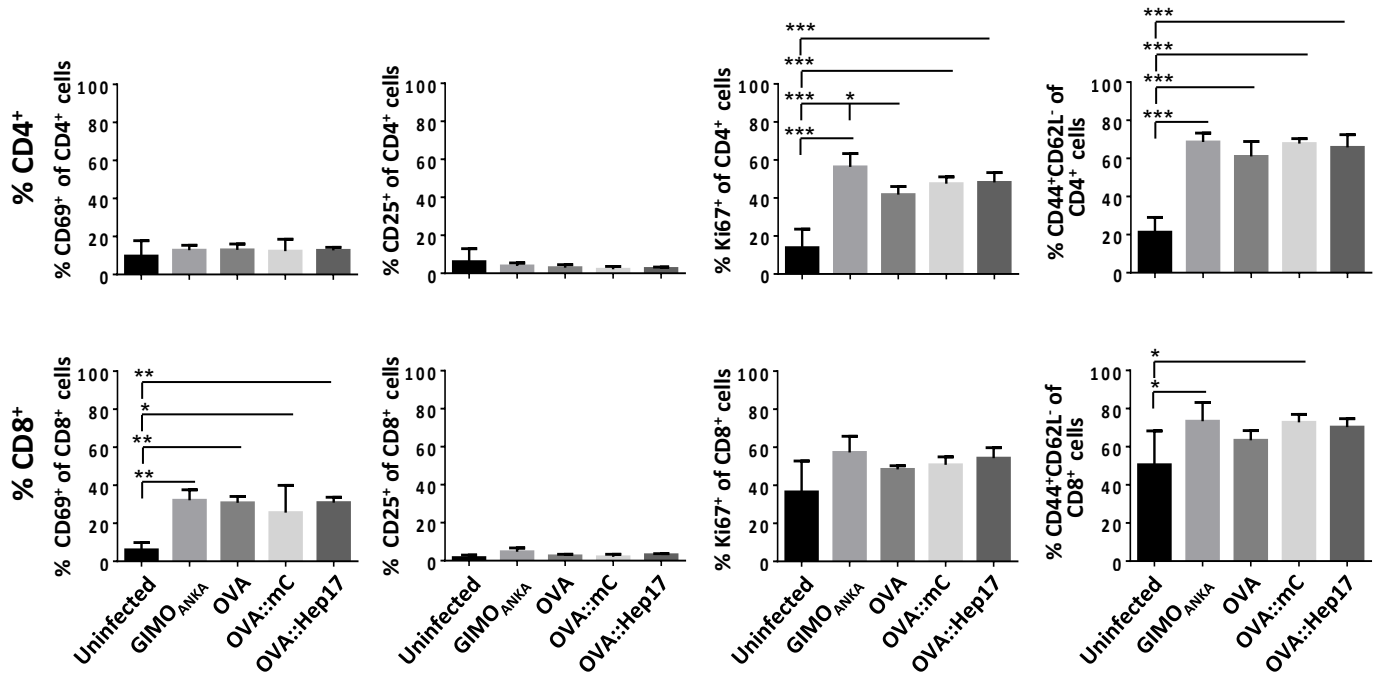

Supplement: IAI.01940-14_zii999090940so1.pdf [file IAI.01940-14_zii999090940so1.pdf]
